# Supplementary material
Source: Springer Nature journal article supplement (https://www.springermedizin.de/resource/supplementary/12879_2009_1031_MOESM9_ESM.pdf/9442434)

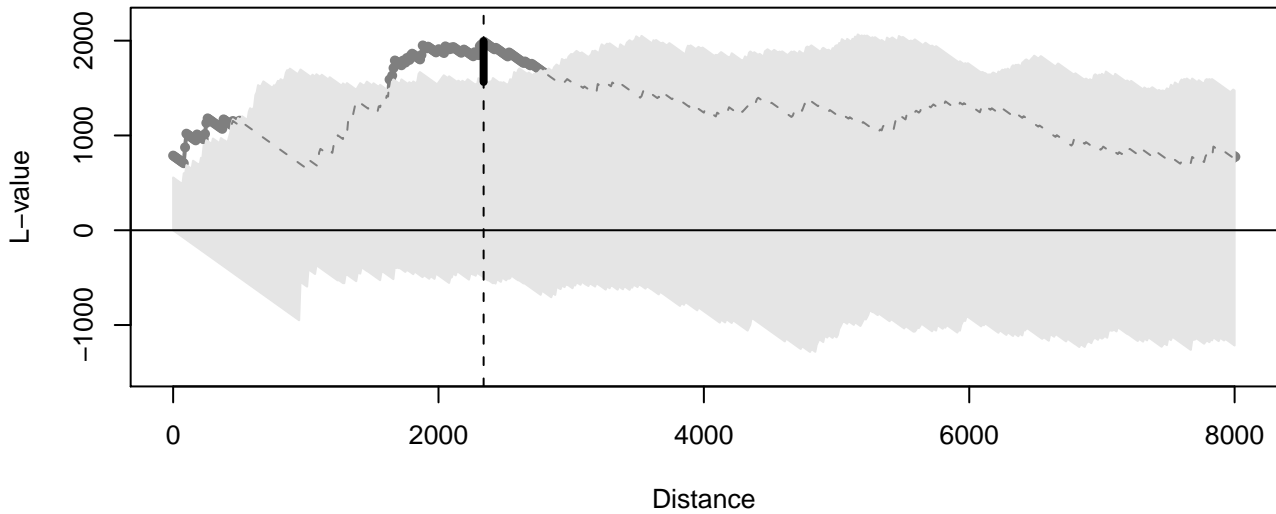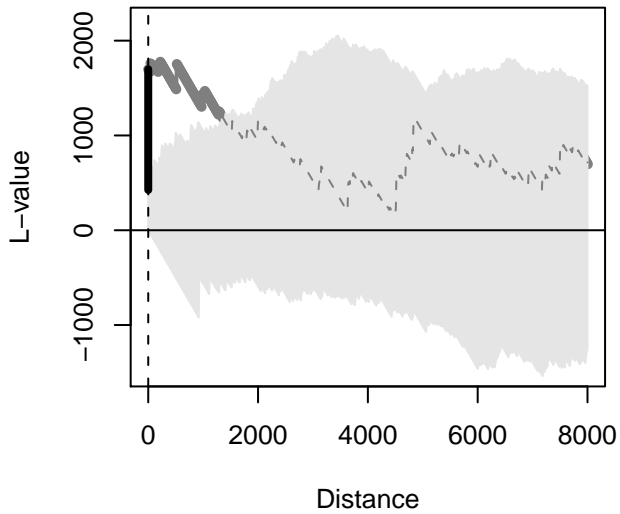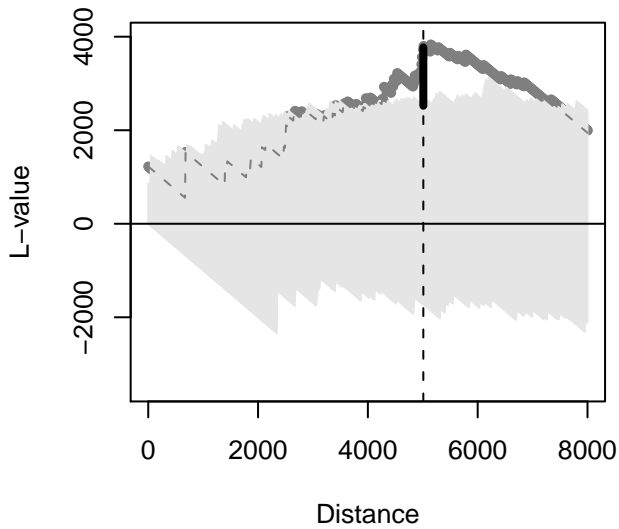

Supplement: MOESM9 [file 9442434]
